# Supplementary material for: General Practice Care for Patients with Rare Diseases in Belgium. A Cross-Sectional Survey
Source: PubMed Central journal article supplement (PMC6025074; doi:10.3390/ijerph15061180), 2018-06-05
Supplement: ijerph-15-01180-s001.pdf [file ijerph-15-01180-s001.pdf]

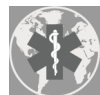

**Table S1.** Characteristics of seven original studies about rare diseases in general practice identified by a literature search (described in Figure S1)

| Reference                              | Place, years        | Population sample                                                                                             | Study aims/objectives                                                                           | Methods                                                                               | Use of European rare disease definition                                                                                                                                                            | Results about caseload, number of cases or prevalence                                                                                                                          |
|----------------------------------------|---------------------|---------------------------------------------------------------------------------------------------------------|-------------------------------------------------------------------------------------------------|---------------------------------------------------------------------------------------|----------------------------------------------------------------------------------------------------------------------------------------------------------------------------------------------------|--------------------------------------------------------------------------------------------------------------------------------------------------------------------------------|
| Avellaneda Fernández <i>et al.</i> [7] | Spain, Madrid, 2004 | 8 groups of GPs from an urban area and 1 rural based GP                                                       | Describe the need for rare disease training in PC                                               | In-depth interviews and group dynamics                                                | EU definition was one of the subjects that was explored                                                                                                                                            | No data                                                                                                                                                                        |
| Avellaneda Fernández <i>et al.</i> [8] | Spain, 2008-10      | 260 (of unknown total) Primary Health Care Physicians (PHCP)                                                  | Describe perceptions of PHCP regarding rare diseases, and the characteristics of these patients | Mail survey                                                                           | Not reported, EU definition is not mentioned in questionnaire.                                                                                                                                     | Mean number of rare disease patients per practice is 2.45 (SD 3.69) and median number is 1 (ranging from 0 to 21); 7/218 (3,2%) PHCP reported to have no rare disease patients |
| McClain <i>et al.</i> [9]              | US, 2011            | 55 family practitioners of 592 (9.2%) with a membership of the the New Hampshire Academy of Family Physicians | Assess primary care pediatric providers' comfort with co-managing patients with rare conditions | Electronic survey concerning the care of children with rare and/or complex conditions | Rare conditions were defined as those occurring in less than 0.1% of children; complex conditions were defined as those involving $\geq 2$ body systems and requiring on-going medical management. | No data                                                                                                                                                                        |
| Miteva <i>et al.</i> [10]              | Bulgaria, 2008      | 1,002 of a random sample of 2,042 GPs (49%)                                                                   | Study the level of knowledge and general awareness on rare diseases among Bulgarian GPs         | Telephone interviews                                                                  | Not reported                                                                                                                                                                                       | 4.2% of the GPs had seen $\geq 1$ rare disease patients in last calendar year                                                                                                  |

|                                |                                                                    |                                                                                                                                               |                                                                                                                                              |                                                                                            |                                                               |                                                                                                                                                                                                                              |
|--------------------------------|--------------------------------------------------------------------|-----------------------------------------------------------------------------------------------------------------------------------------------|----------------------------------------------------------------------------------------------------------------------------------------------|--------------------------------------------------------------------------------------------|---------------------------------------------------------------|------------------------------------------------------------------------------------------------------------------------------------------------------------------------------------------------------------------------------|
| Phillips [11]                  | US, year not reported                                              | Selection of 100 patients with newly diagnosed rare disease from 4 family physicians in one practice                                          | Describe the roles GPs play in the identification and management of patients with rare conditions in a typical practice                      | Office record review                                                                       | “No objective definition of ‘rare condition’ is available...” | No data<br>Study goal “was not to estimate epidemiologic rates or to measure workload”                                                                                                                                       |
| van de Laar <i>et al.</i> [12] | Nijmegen, Netherlands, 1986-2006                                   | General practice patients included in the Continuous Morbidity Registration (CMR) Nijmegen (N=13,500)                                         | Explore the prevalence of rare diseases and discuss methodological difficulties of studying rare disease in general practice                 | Extraction of diseases with a prevalence of < 0,5/1000 patient years from the CMR database | Results were compared with EU defined rare diseases           | 20 of 56 (36%) eligible codes referred to conditions that were listed as rare diseases in Orphanet                                                                                                                           |
| Van Nispen and Rijken [13]     | Netherlands, baseline data from 1998 and additional data from 2002 | 206 rare disease patients from a nationwide representative sample of non-institutionalized chronic disease patients from 56 general practices | Describe health problems and quality of life experienced by people with uncommon chronic diseases, their GP treatment and their expectations | Mail and telephone interviews                                                              | Use of EU rare disease definition                             | 72 rare diseases were described; 90% of rare disease patients had ≥1 GP contacts per year; Over 20% of rare disease patients experienced care needs not met by their GP and 16% needed more coordination of care by their GP |

**Table S2.** List of 99 rare diseases reported for 121 active patients in the Belgian Network of SGP in 2015

| Orphanet name for reported disease                                            | N of active patients |
|-------------------------------------------------------------------------------|----------------------|
| 46, XX ovotesticular disorder of sex development (DSD)                        | 1                    |
| Addison disease                                                               | 1                    |
| Aicardi-Goutières syndrome                                                    | 1                    |
| Albright hereditary osteodystrophy                                            | 2                    |
| Alport syndrome                                                               | 2                    |
| Amyotrophic lateral sclerosis (ALS)                                           | 3                    |
| Arachnoid cyst                                                                | 1                    |
| Arthrogryposis multiplex congenita                                            | 1                    |
| Becker muscular dystrophy                                                     | 1                    |
| Behçet disease                                                                | 1                    |
| <i>C1q esterase deficiency</i> <sup>2</sup>                                   | 1                    |
| Central diabetes insipidus                                                    | 1                    |
| Charcot-Marie-Tooth disease                                                   | 2                    |
| Chondrodysplasia punctata - <i>peroxisomal disorder</i> <sup>2</sup>          | 1                    |
| Classic congenital adrenal hyperplasia due to 21-hydroxylase deficiency       | 1                    |
| Coats disease                                                                 | 1                    |
| Congenital Adrenal Hyperplasia                                                | 1                    |
| Congenital factor VII deficiency - <i>causing parahemophilia</i> <sup>2</sup> | 1                    |
| <i>Congenital hypophosphatemia</i> <sup>2</sup>                               | 1                    |
| Craniopharyngioma                                                             | 1                    |
| Cutaneous lupus erythematosus                                                 | 1                    |
| Cutaneous mastocytosis <sup>1</sup>                                           | 2                    |
| Cystinosis                                                                    | 1                    |
| Dermatomyositis                                                               | 1                    |
| Disorder of bile acid synthesis                                               | 1                    |
| Duchenne                                                                      | 1                    |
| Dyskeratosis congenita (DC)                                                   | 1                    |
| Ehlers-Danlos syndrome                                                        | 2                    |
| Ehlers-Danlos syndrome type 2                                                 | 1                    |
| Episodic ataxia type 5                                                        | 1                    |
| Extraskeletal myxoid chondrosarcoma                                           | 1                    |
| Fabry disease                                                                 | 1                    |
| Familial adenomatous polyposis                                                | 1                    |
| Familial Mediterranean fever                                                  | 2                    |
| Friedreich ataxia                                                             | 2                    |
| Gastrointestinal stromal tumor (GIST)                                         | 1                    |
| Gaucher disease                                                               | 1                    |
| Goodpasture syndrome                                                          | 1                    |
| <i>Hereditary leukodystrophy with axonal spheroids</i> <sup>2</sup>           | 1                    |
| <i>Familial spasmodic paraparesis</i> <sup>2</sup>                            | 1                    |
| Horton disease                                                                | 1                    |
| Huntington disease                                                            | 3                    |
| <i>Hyper IgM syndrome</i> <sup>2</sup>                                        | 1                    |
| Hypokalemic periodic paralysis                                                | 1                    |

|                                                       |   |
|-------------------------------------------------------|---|
| Hypophosphatasia                                      | 1 |
| Idiopathic pulmonary fibrosis                         | 1 |
| Kallmann syndrome                                     | 1 |
| Klippel-Trénaunay syndrome                            | 1 |
| Kugelberg-Welander disease                            | 1 |
| <i>L-carnitine deficiency</i> <sup>1,2</sup>          | 1 |
| Leber plus disease                                    | 1 |
| Li-Fraumeni syndrome                                  | 1 |
| Loeys-Dietz syndrome                                  | 1 |
| <i>Lupus</i> <sup>1</sup>                             | 2 |
| Mabry syndrome                                        | 1 |
| MALToma                                               | 1 |
| Maple syrup urine disease                             | 2 |
| Marfan syndrome                                       | 1 |
| Medium chain acyl-CoA dehydrogenase (MCAD) deficiency | 1 |
| MELAS                                                 | 2 |
| Merosin negative congenital muscular dystrophy        | 1 |
| Mitochondrial myopathy                                | 1 |
| Mowat-Wilson syndrome                                 | 1 |
| Mucoviscidosis                                        | 2 |
| Multiple acyl-CoA dehydrogenase deficiency (MADD)     | 1 |
| Multiple endocrine neoplasia type 1 (MEN 1)           | 1 |
| Multiple system atrophy                               | 1 |
| Muscular dystrophy                                    | 1 |
| Myasthenia gravis                                     | 1 |
| <i>Neurofibromatosis</i> <sup>2</sup>                 | 3 |
| Neurofibromatosis type 1                              | 3 |
| Neuronal ceroid lipofuscinosis                        | 1 |
| Osteogenesis imperfecta                               | 1 |
| <i>Parapemphigus</i> <sup>2</sup>                     | 1 |
| Paroxysmal nocturnal hemoglobinuria                   | 1 |
| Pleural mesothelioma                                  | 1 |
| Poland syndrome                                       | 1 |
| Postlingual non-syndromic genetic deafness            | 1 |
| Prader-Willi syndrome                                 | 1 |
| Primary biliary cirrhosis                             | 1 |
| Pseudoxanthoma elasticum                              | 1 |
| Pyoderma gangrenosum                                  | 1 |
| Rare hereditary disease with peripheral neuropathy    | 1 |
| Ring chromosome 20                                    | 1 |
| Sarcoidosis                                           | 1 |
| Scleroderma                                           | 2 |
| Septo-optic dysplasia spectrum                        | 1 |
| Severe hemophilia A                                   | 1 |
| Sickle cell anemia                                    | 2 |
| Smith-Magenis syndrome                                | 2 |
| Sotos syndrome                                        | 1 |

---

|                                              |   |
|----------------------------------------------|---|
| Stargardt disease                            | 1 |
| Syringomyelia                                | 1 |
| Systemic mastocytosis                        | 1 |
| Trisomy 18 - <i>mosaic form</i> <sup>2</sup> | 1 |
| Turner syndrome                              | 1 |
| Waldenström macroglobulinemia                | 1 |
| Wegener granulomatosis                       | 1 |
| Young-onset Parkinson disease                | 1 |

Notes:<sup>1</sup> The rare disease status could not be fully confirmed due to incomplete information provided by the GP. <sup>2</sup> Disease name not (yet) included in the ORPHA nomenclature.

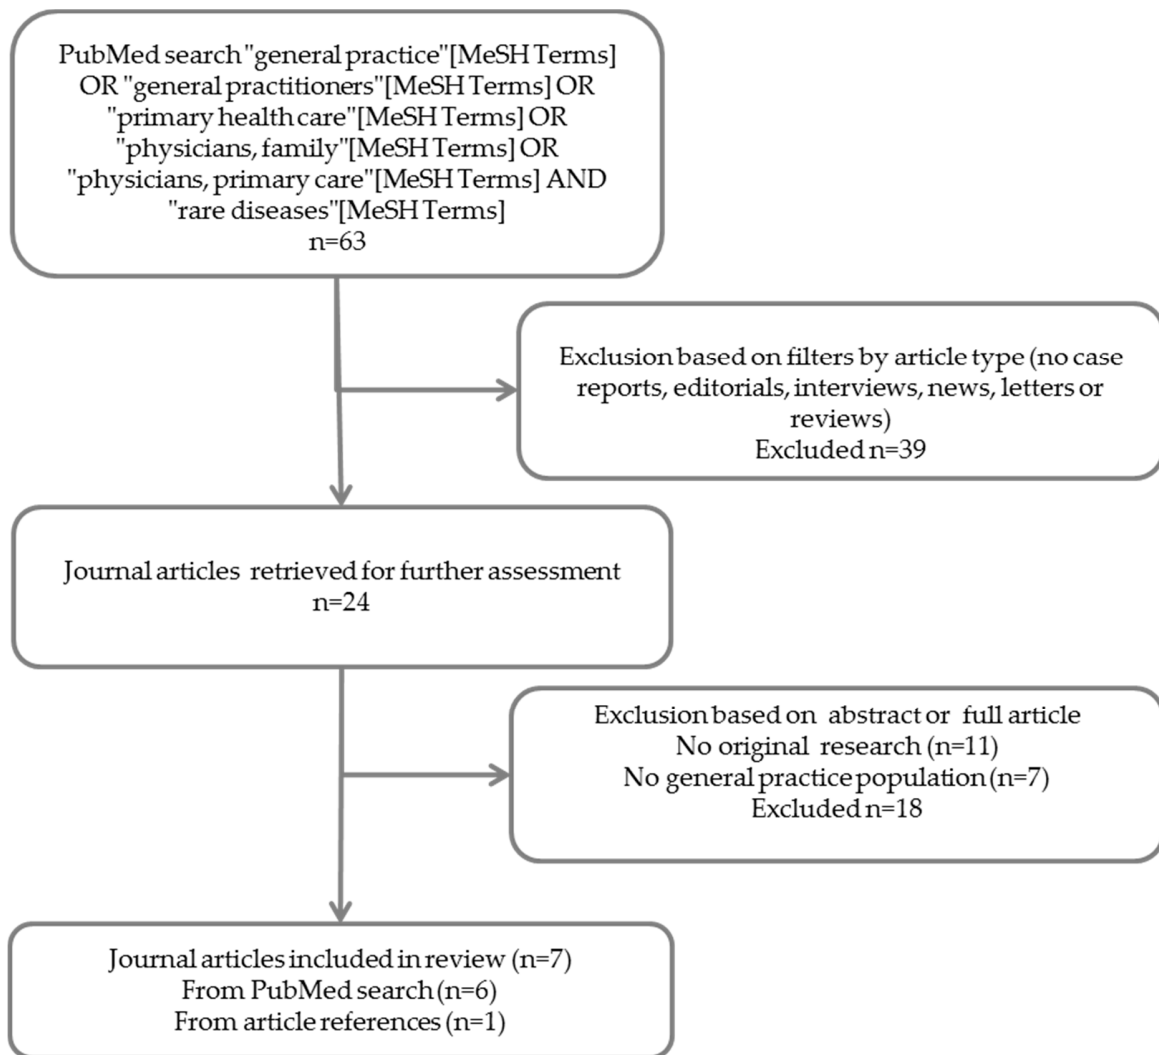

**Figure S1.** Flow chart of search for original studies on rare diseases in general practice
